# Supplementary material for: Design of a novel Ag-MOF@GO composite with a high specific surface area and structural stability for the efficient removal of malachite green
Source: Royal Society of Chemistry journal article supplement (doi:10.1039/d3nj02301j), 2023-01-01
Supplement: d3nj02301j1.pdf [file d3nj02301j1.pdf]

## Supplementary Information

For

### **Design of novel Ag-MOF@GO composite with high specific surface area and structural stability for efficient removal of malachite green**

Xingguo Deng<sup>a</sup>, Jingchao Li<sup>a,\*</sup>, Bo Zhao<sup>b,c</sup>, Zhihua Li<sup>b,c</sup>

<sup>a</sup> Hunan Food and Drug Vocational College, Changsha, 410000, P.R. China.

<sup>b</sup> Key Laboratory of Nonferrous Metal Materials Science and Engineering of Ministry of Education, Central South University, Changsha, 410083, P.R. China.

<sup>c</sup> School of Materials Science and Engineering, Central South University, Changsha, 410083, P.R. China.

\* Corresponding author: Jingchao Li, E-mail: [ligfz@csu.edu.cn](mailto:ligfz@csu.edu.cn).

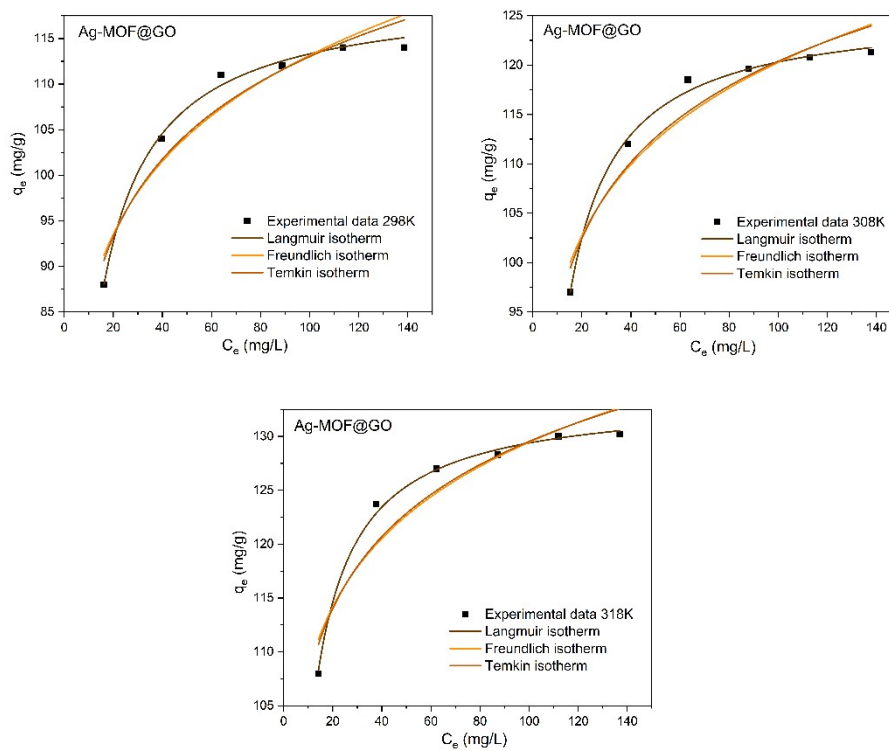

**Fig. S1.** Langmuir, Freundlich and Temkin isotherm models for the adsorption of MG dyes at three different temperatures using Ag-MOF@GO.

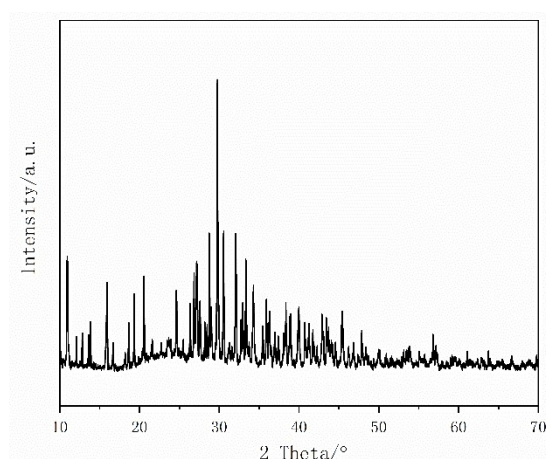

**Fig. S2.** XRD spectra of Ag-MOF@GO after three cycles.
